# Supplementary material for: Solubility and crystallographic facet tailoring of (GaN)1−x(ZnO)x pseudobinary solid-solution nanostructures as promising photocatalysts
Source: Royal Society of Chemistry journal article supplement (doi:10.1039/c5nr08663a), 2016-01-01
Supplement: c5nr08663a1.pdf [file c5nr08663a1.pdf]

## Supporting information

### **Solubility and crystallographic facet tailoring of $(\text{GaN})_{1-x}(\text{ZnO})_x$ pseudobinary solid-solution nanostructures as promising photocatalysts**

Jing Li,<sup>†,‡</sup> Baodan Liu,<sup>†,\*</sup> Wenjin Yang,<sup>†</sup> Yujin Cho,<sup>§</sup> Xinglai Zhang,<sup>†</sup> Benjamin Dierre,<sup>§</sup> Takashi Sekiguchi,<sup>§</sup> Aimin Wu,<sup>‡</sup> Xin Jiang<sup>†,\*</sup>

<sup>†</sup>Shenyang National Laboratory for Materials Science (SYNL), Institute of Metal Research (IMR), Chinese Academy of Sciences (CAS), No. 72 Wenhua Road, Shenyang 110016 China

<sup>‡</sup>School of Materials Science and Engineering, Dalian University of Technology, Dalian 116024, China

<sup>§</sup>Nano-Electronics Materials Unit, National Institute for Materials Science (NIMS), 1-1 Namiki, Tsukuba 305-0044, Japan

\*To whom correspondence should be addressed: [baodanliu@hotmail.com](mailto:baodanliu@hotmail.com)

**Figure S1** (a) EDS spectra of  $(\text{GaN})_{1-x}(\text{ZnO})_x$  nanorods synthesized at different temperature. (b) Comparative atomic percentages of Ga and Zn elements in the three typical samples with a nitridation time of 30, 60, 120 min, respectively (the data is obtained based on the EDS measurements in TEM and SEM modes).

**Figure S2** (a) XRD patterns of as-synthesized samples at 800 °C under different growth time: 0 (before nitridation), 30, 60 and 120 min; (b) magnified curves of (100) and (002) peaks for all samples;

**Figure S3** (a) UV-visible diffuse reflectance spectra of obtained samples before nitridation and after 30, 60 and 120 min nitridation at 800 °C; (b) UV-visible diffuse reflectance spectra of obtained samples under different growth temperatures (alternately 800, 850, 900 °C) for 60 min;

**Figure S4** (a) Sectional view images of three typical morphology nanorods at different growth time: 30, 60 and 120 min;

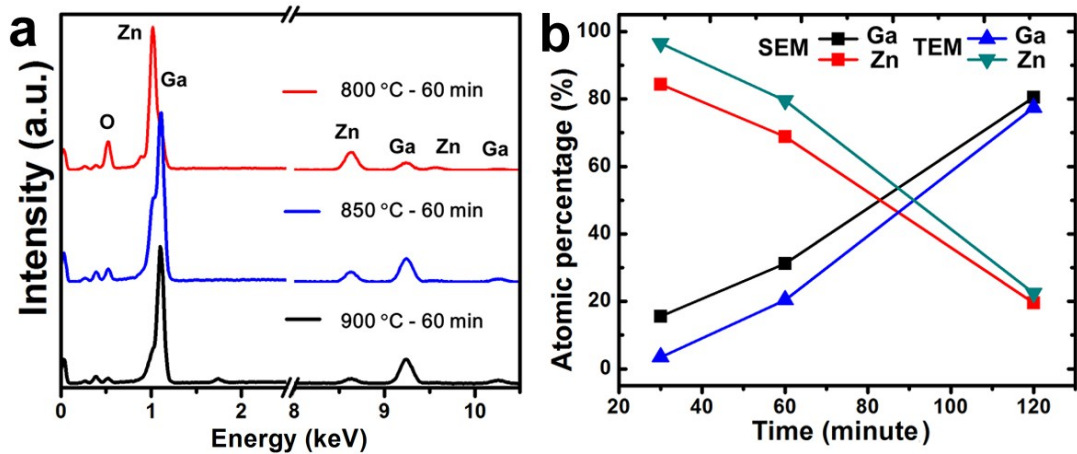

Figure S1.

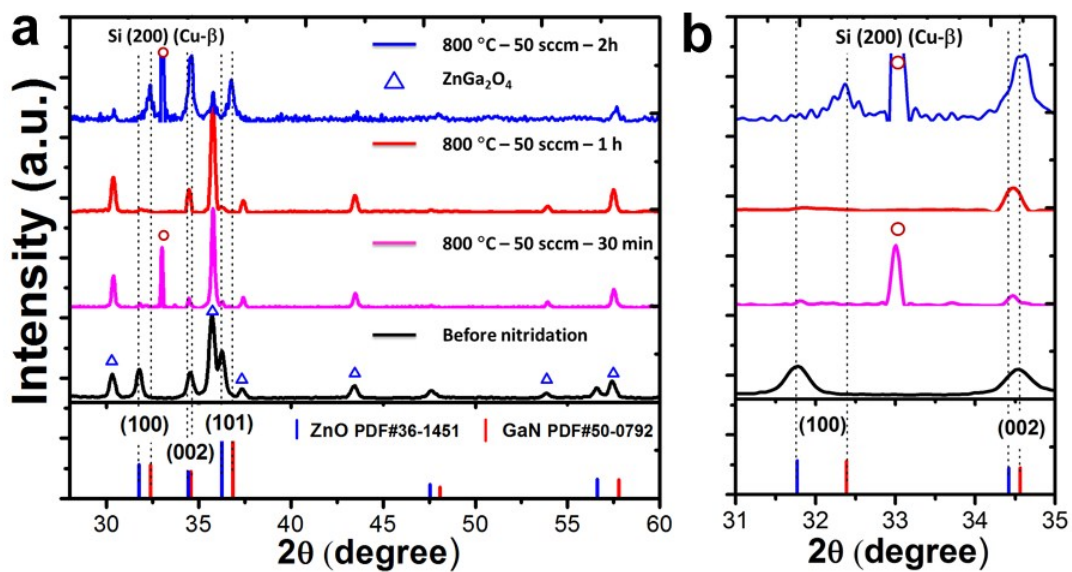

Figure S2.

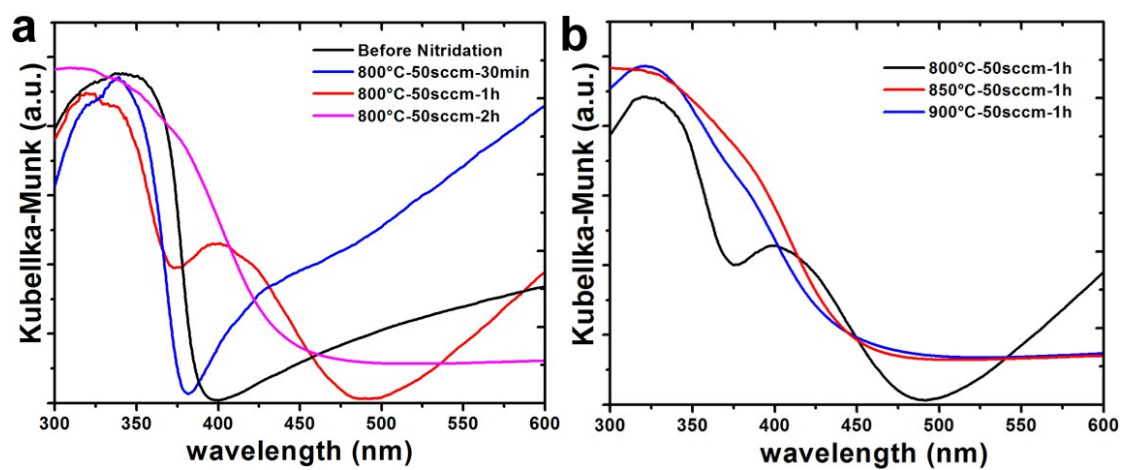

Figure S3.

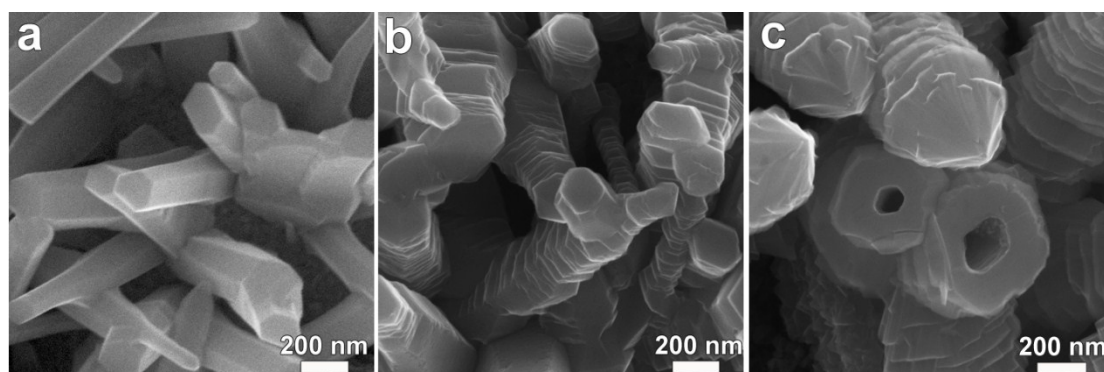

Figure S4.
